# Supplementary material
Source: PubMed Central journal article supplement (PMC6245212)

SUPPLEMENTARY DATA

**Supplementary Table S1. Eigenvalues and variance explained by the 15 extracted factors (PCA).**

| <b>Factor</b>    | <b>Eigenvalue</b> | <b>Variance explained (%)</b> | <b>Cumulative</b> |
|------------------|-------------------|-------------------------------|-------------------|
| <b>Factor 1</b>  | 53.35             | 25.77                         | 25.77             |
| <b>Factor 2</b>  | 31.76             | 15.35                         | 41.12             |
| <b>Factor 3</b>  | 23.83             | 11.51                         | 52.63             |
| <b>Factor 4</b>  | 14.25             | 6.88                          | 59.51             |
| <b>Factor 5</b>  | 9.94              | 4.8                           | 64.32             |
| <b>Factor 6</b>  | 8.33              | 4.03                          | 68.34             |
| <b>Factor 7</b>  | 6.38              | 3.08                          | 71.42             |
| <b>Factor 8</b>  | 5.88              | 2.84                          | 74.26             |
| <b>Factor 9</b>  | 4.70              | 2.27                          | 76.54             |
| <b>Factor 10</b> | 3.77              | 1.82                          | 78.36             |
| <b>Factor 11</b> | 2.91              | 1.41                          | 79.76             |
| <b>Factor 12</b> | 2.53              | 1.22                          | 80.99             |
| <b>Factor 13</b> | 2.43              | 1.17                          | 82.16             |
| <b>Factor 14</b> | 2.19              | 1.06                          | 83.22             |
| <b>Factor 15</b> | 2.00              | 0.97                          | 84.19             |

SUPPLEMENTARY DATA

**Supplementary Table S2. Association between baseline lipid factors (PCA extracted) and T2D risk (adjusted for age, sex and intervention group)**

|                                     | <b>Factor</b> | <b>Description</b>                                                                                                                     | <b>Components</b>                                                                                                                                                                                                                                                                                                                                                                                                                                                                                                                                          |
|-------------------------------------|---------------|----------------------------------------------------------------------------------------------------------------------------------------|------------------------------------------------------------------------------------------------------------------------------------------------------------------------------------------------------------------------------------------------------------------------------------------------------------------------------------------------------------------------------------------------------------------------------------------------------------------------------------------------------------------------------------------------------------|
| <b>Inverse association with T2D</b> | <b>3</b>      | PC-plasmalogens<br><br>Sphingomyelins (SM)<br><br>Lysophosphatidylcholines (LPC) and Lysophosphatidylethanolamines (LPE)               | 364pca 182ce 386pcplasmalogen 160ce 407pcplasmalogen 241ceramided181 343pc 382pc 364pcplasmalogen 343pcplasmalogen 362pcplasmalogen 341pcplasmalogenb 363pc 361psplasmalogen 384pcplasmalogen 341pcplasmalogena 361pcplasmalogen 342pcplasmalogen 360pc 320pc 363pcplasmalogen 382pe 342pc 362pc 340pc 362psplasmalogen 220ceramided181 240ceramided181 5410tag 180ce 160ceramided181 182sm 140sm 241sm 181sm 240sm cholesterol 161sm 180sm 221sm 200sm 160sm 220sm                                                                                        |
|                                     | <b>7</b>      | Cholesterol esters (CE)                                                                                                                | c340pc 181lpe 140lpc 226lpe 204lpe 182lpc 205lpc 161lpc 204lpc c226lpc 160lpe 220lpe 200lpe 180lpe 181lpc 180lpc 203lpc 160lpc                                                                                                                                                                                                                                                                                                                                                                                                                             |
|                                     | <b>10</b>     |                                                                                                                                        | 406ps 361peplasmalogen 200lpe 513tag 340pe 532tag 533tag 553tag 382pe                                                                                                                                                                                                                                                                                                                                                                                                                                                                                      |
|                                     | <b>13</b>     |                                                                                                                                        | 361psplasmalogen 320pc 342pcplasmalogen 341pcplasmalogena 364pcplasmalogen                                                                                                                                                                                                                                                                                                                                                                                                                                                                                 |
| <b>Direct association with T2D</b>  | <b>1</b>      | Triacylglycerides (TAG) with $\leq 56$ C and $\leq 3$ double bonds<br><br>Diacylglycerides (DAG)<br><br>Phosphatidylethanolamines (PE) | 182ce* 224ce* 160ce* 226ce* 204ce* 181ce* 382pc 161lpc 361pc 320pc 384dag 406pe 362dag 385dag 161ce 341pc 140ce 527tag 542tag 526tag 364pe 383pc 532tag 513tag 562tag 343pc 362pe 406ps 361pe 342pe 343dag 344pc 340pe 522tag 552tag 322pc 504tag 342dag 505tag 140lpc 320pe 341dag 340dag 561tag 361dag 321pc 503tag 484tag 541tag 512tag 300pc 301pc 493tag 300dag 521tag 321dag 520tag 502tag 510tag 463tag 483tag 320dag 501tag 492tag 442tag 420tag 491tag 511tag 451tag 471tag 500tag 480tag 472tag 441tag 462tag 482tag 460tag 440tag 481tag 461tag |
|                                     | <b>5</b>      |                                                                                                                                        | 160ce 533tag 341pc 341dag 541tag 361dag 544tag 523tag 361pc 241ceramided181 361pe 532tag 564tag 552tag 522tag 553tag 562tag 362dag 542tag 563tag 543tag                                                                                                                                                                                                                                                                                                                                                                                                    |
|                                     | <b>11</b>     |                                                                                                                                        | 406pe 362pe 384pe 385pe 363pe 386pe 342pe 364pe                                                                                                                                                                                                                                                                                                                                                                                                                                                                                                            |

\*Negative loading factors

SUPPLEMENTARY DATA

**Supplementary Table S3. Baseline lipid scores of the subcohort depending on intervention arm of the trial**

|                    | <b>Control</b> | <b>MedDiet+EVOO</b> | <b>MedDiet+Nuts</b> | <b>p value</b> |
|--------------------|----------------|---------------------|---------------------|----------------|
| <b>LP score</b>    | 2.56 (12.75)   | 0.26 (12.19)        | 0.5 (13.28)         | 0.113          |
| <b>PC-PL score</b> | 0.12 (10.31)   | 1.37 (11.65)        | 0.82 (12.23)        | 0.523          |
| <b>SM score</b>    | 0.94 (8.62)    | 0.91 (9.26)         | 0.69 (9.41)         | 0.950          |
| <b>CE score</b>    | -0.36 (8.46)   | 1.78 (7.5)          | 1.19 (8.92)         | 0.021          |
| <b>TAG score</b>   | 0.81 (31.46)   | -3.13 (29.73)       | -5.86 (32.78)       | 0.068          |
| <b>DAG score</b>   | 0.58 (10.50)   | -1.77 (9.60)        | -1.78 (10.39)       | 0.015          |
| <b>PE score</b>    | 0.14 (8.97)    | -0.44 (8.14)        | -1.56 (8.95)        | 0.097          |

SUPPLEMENTARY DATA

Supplementary Table S4. Association (hazard ratios, 95% confidence intervals) between 1-y changes lipid scores and T2D risk

|                                                                                                                                 | Quartiles of scores |                         |                  |                         | Linear trend | Per SD                  |
|---------------------------------------------------------------------------------------------------------------------------------|---------------------|-------------------------|------------------|-------------------------|--------------|-------------------------|
|                                                                                                                                 | Q1                  | Q2                      | Q3               | Q4                      |              |                         |
| <b>Lysophospholipids (LP) score of changes (lysophosphatidylcholines and lysophosphatidylethanolamines); n of molecules=18</b>  |                     |                         |                  |                         |              |                         |
| M1*                                                                                                                             | Ref.                | 0.90 (0.50-1.60)        | 0.79 (0.44-1.43) | 0.77 (0.42-1.43)        | 0.354        | 0.88 (0.70-1.11)        |
| M2*                                                                                                                             | Ref.                | 0.97 (0.53-1.77)        | 0.90 (0.49-1.66) | 0.75 (0.38-1.47)        | 0.343        | 0.87 (0.68-1.11)        |
| M3*                                                                                                                             | Ref.                | 1.61 (0.77-3.37)        | 1.05 (0.47-2.31) | 0.97 (0.44-2.14)        | 0.685        | 0.94 (0.69-1.30)        |
| <b>Phosphatidylcholines plasmalogens (phosphatidylcholines-pl) score of changes; n of molecules=15</b>                          |                     |                         |                  |                         |              |                         |
| M1*                                                                                                                             | Ref.                | 0.64 (0.37-1.11)        | 0.61 (0.34-1.07) | 0.57 (0.32-1.03)        | 0.084        | 0.88 (0.72-1.07)        |
| M2*                                                                                                                             | Ref.                | 0.62 (0.35-1.12)        | 0.63 (0.35-1.13) | 0.57 (0.31-1.05)        | 0.106        | 0.91 (0.75-1.11)        |
| M3*                                                                                                                             | Ref.                | 0.97 (0.46-2.07)        | 0.93 (0.45-1.90) | 0.61 (0.28-1.35)        | 0.235        | 0.88 (0.64-1.22)        |
| <b>Sphingomielines (SM) score of changes; n of molecules=11</b>                                                                 |                     |                         |                  |                         |              |                         |
| M1*                                                                                                                             | Ref.                | 0.95 (0.54-1.70)        | 0.93 (0.52-1.64) | 0.68 (0.36-1.27)        | 0.261        | 0.86 (0.70-1.06)        |
| M2*                                                                                                                             | Ref.                | 1.09 (0.60-1.99)        | 0.98 (0.53-1.80) | 0.74 (0.39-1.44)        | 0.348        | 0.89 (0.71-1.11)        |
| M3*                                                                                                                             | Ref.                | 1.06 (0.49-2.26)        | 1.72 (0.81-3.64) | 0.69 (0.32-1.45)        | 0.658        | 0.92 (0.69-1.23)        |
| <b>Cholesterol esters (CE) score of changes; n of molecules=13</b>                                                              |                     |                         |                  |                         |              |                         |
| M1*                                                                                                                             | Ref.                | 0.81 (0.47-1.40)        | 0.73 (0.42-1.28) | 0.84 (0.47-1.49)        | 0.539        | 0.82 (0.65-1.04)        |
| M2*                                                                                                                             | Ref.                | 0.88 (0.50-1.56)        | 0.81 (0.45-1.45) | 0.92 (0.51-1.68)        | 0.788        | 0.85 (0.67-1.08)        |
| M3*                                                                                                                             | Ref.                | 0.89 (0.46-1.70)        | 0.70 (0.32-1.52) | 0.96 (0.46-2.00)        | 0.846        | 0.88 (0.60-1.28)        |
| <b>Triacylglycerides (TAG) score of changes (<math>\leq 56C</math> and <math>\leq 3</math> double bonds); n of molecules=40</b> |                     |                         |                  |                         |              |                         |
| M1*                                                                                                                             | Ref.                | 0.83 (0.47-1.47)        | 1.08 (0.60-1.97) | 1.52 (0.86-2.68)        | 0.098        | 1.19 (0.96-1.46)        |
| M2*                                                                                                                             | Ref.                | 0.83 (0.47-1.49)        | 1.10 (0.60-2.02) | 1.40 (0.76-2.60)        | 0.196        | 1.19 (0.97-1.47)        |
| M3*                                                                                                                             | Ref.                | 1.04 (0.51-2.14)        | 1.37 (0.66-2.86) | 1.45 (0.65-3.23)        | 0.286        | 1.24 (0.92-1.68)        |
| <b>Diacylglycerides (DAG) score of changes; n of molecules=14</b>                                                               |                     |                         |                  |                         |              |                         |
| M1*                                                                                                                             | Ref.                | 1.33 (0.76-2.32)        | 1.04 (0.60-1.82) | 1.49 (0.85-2.64)        | 0.228        | 1.19 (0.98-1.45)        |
| M2*                                                                                                                             | Ref.                | 1.27 (0.71-2.25)        | 1.10 (0.61-1.95) | 1.39 (0.77-2.52)        | 0.304        | 1.15 (0.94-1.40)        |
| M3*                                                                                                                             | Ref.                | <b>2.09 (1.03-4.26)</b> | 1.92 (0.93-3.99) | 1.64 (0.78-3.46)        | 0.212        | 1.20 (0.91-1.57)        |
| <b>Phosphatidylethanolamines (PE) score of changes; n of molecules=12</b>                                                       |                     |                         |                  |                         |              |                         |
| M1*                                                                                                                             | Ref.                | 1.21 (0.69-2.11)        | 1.23 (0.68-2.22) | <b>1.87 (1.06-3.30)</b> | <b>0.035</b> | <b>1.25 (1.02-1.54)</b> |
| M2*                                                                                                                             | Ref.                | 1.23 (0.70-2.18)        | 1.29 (0.71-2.36) | <b>1.85 (1.01-3.38)</b> | <b>0.044</b> | <b>1.25 (1.01-1.56)</b> |
| M3*                                                                                                                             | Ref.                | 1.64 (0.79-3.40)        | 1.86 (0.82-4.21) | 1.74 (0.79-3.84)        | 0.154        | 1.27 (0.93-1.73)        |

SUPPLEMENTARY DATA

**Supplementary Table S5. Association (hazard ratios, 95% confidence intervals) between interventions and T2D risk after 1 year of follow-up considering lipid change scores: mediation analysis**

|                                                    | Intervention groups |                  |         |                  |         |
|----------------------------------------------------|---------------------|------------------|---------|------------------|---------|
|                                                    | Control             | MedDiet+EVOO     |         | MedDiet+Nuts     |         |
|                                                    | HR (95% CI)         | HR (95% CI)      | p value | HR (95% CI)      | p value |
| <b>Reference model* 1: w/ LP baseline score</b>    | Ref                 | 0.39 (0.19-0.79) | 0.009   | 0.48 (0.25-0.94) | 0.032   |
| <b>Reference model 1+ LP change score</b>          | Ref                 | 0.39 (0.20-0.79) | 0.008   | 0.49 (0.25-0.96) | 0.038   |
| <b>Reference model* 2: w/ PC-pl baseline score</b> | Ref                 | 0.48 (0.23-0.98) | 0.044   | 0.49 (0.24-1.00) | 0.049   |
| <b>Reference model 2+PC-pl change score</b>        | Ref                 | 0.45 (0.22-0.93) | 0.031   | 0.50 (0.24-1.03) | 0.061   |
| <b>Reference model* 3: w/ SP baseline score</b>    | Ref                 | 0.46 (0.22-0.92) | 0.029   | 0.43 (0.21-0.85) | 0.016   |
| <b>Reference model 3+SP change score</b>           | Ref                 | 0.40 (0.19-0.83) | 0.014   | 0.40 (0.20-0.81) | 0.011   |
| <b>Reference model* 4: w/ CE baseline score</b>    | Ref                 | 0.45 (0.22-0.91) | 0.027   | 0.55 (0.28-1.07) | 0.079   |
| <b>Reference model 4+CE change score</b>           | Ref                 | 0.43 (0.21-0.89) | 0.022   | 0.55 (0.28-1.09) | 0.085   |
| <b>Reference model* 5: w/ TAG baseline score</b>   | Ref                 | 0.39 (0.19-0.80) | 0.010   | 0.49 (0.25-0.96) | 0.039   |
| <b>Reference model* 5+TAG change score</b>         | Ref                 | 0.45 (0.22-0.93) | 0.032   | 0.53 (0.26-1.06) | 0.071   |
| <b>Reference model* 6: w/ DAG baseline score</b>   | Ref                 | 0.38 (0.19-0.80) | 0.010   | 0.54 (0.28-1.05) | 0.071   |
| <b>Reference model 6+DAG change score</b>          | Ref                 | 0.43 (0.21-0.89) | 0.024   | 0.53 (0.27-1.04) | 0.064   |
| <b>Reference model* 7: w/ PE baseline score</b>    | Ref                 | 0.36 (0.18-0.73) | 0.005   | 0.51 (0.26-0.99) | 0.048   |
| <b>Reference model 7+PE change score</b>           | Ref                 | 0.40 (0.18-0.87) | 0.021   | 0.51 (0.26-1.00) | 0.048   |

\*Cox models were adjusted for age, BMI, smoking, hypertension, dyslipidemia, baseline glucose (linear and quadratic term), propensity scores (to estimate the probability of assignment to each of the intervention groups) and sex center and educational level as strata.

SUPPLEMENTARY DATA

**Supplementary Table S6. Description of the studies used to compared and discuss lipidome profiles associated with T2D**

| Authors                | Country   | Year | Design                                                                        | N of subjects | Lipid class         | Association with T2D                                                                             |
|------------------------|-----------|------|-------------------------------------------------------------------------------|---------------|---------------------|--------------------------------------------------------------------------------------------------|
| Barber MN, et al       | Australia | 2012 | Cross-sectional*                                                              | 30            | LPC                 | Inversely associated with T2D and obesity                                                        |
| Zhao X, et al          | Germany   | 2010 | Cross-sectional                                                               | 51            | LPC                 | Inversely associated with prediabetic stage                                                      |
| Tonks TK, et al        | Australia | 2016 | Cross-sectional                                                               | 51            | LPC                 | Inversely associated with insulin resistance                                                     |
| Lehman R, et al        | Germany   | 2013 | Intervention study (9 months): energy restricted, low fat and high fiber diet | 40            | LPC                 | Associated with better insulin sensitivity in NAFL subjects                                      |
| Garcia-Fontana B et al | Spain     | 2016 | Cross-sectional                                                               | 30            | LPC and LPE         | Inversely associated with T2D and inversely associated with the risk of CVD in diabetic patients |
| Floegel A, et al       | Germany   | 2013 | Case-cohort (EPIC Potsdam)                                                    | 800/2,282     | LPC and SM          | Inversely associated with T2D                                                                    |
|                        |           |      | Cross-sectional (KORA study)                                                  | 876           |                     |                                                                                                  |
|                        |           |      | Cross-sectional (TüF study)                                                   | 76            |                     |                                                                                                  |
| Morris JK, et al       | USA       | 2017 | Cross-sectional                                                               | 126           | SM                  | Inversely associated with T2D in cognitively healthy subjects                                    |
| Xu F, et al            | China     | 2013 | Cross-sectional                                                               | 111           | SM                  | Inversely associated with impaired fasting glucose and T2D metabolomics profiles                 |
| Meikle PJ, et al       | Australia | 2013 | Case-control (nested in AusDiab cohort)                                       | 117/234       | CE, DAG, TAG and PE | Directly associated with T2D                                                                     |
|                        |           |      | Cross-sectional (SAFHS cohort)                                                | 1,076         | PC-PL               | Inversely associated with T2D                                                                    |
| Kopprasch S, et al     | Germany   | 2016 | Cross-sectional                                                               | 90            | CE, TAG, SM         | Directly associated with T2D                                                                     |
| Rhee EP, et al         | USA       | 2011 | Nested case-control (FHS cohort)                                              | 189/189       | Short TAG           | Directly associated with T2D                                                                     |

\*The results are confirmed in human studies and murine models fed with different diets

## SUPPLEMENTARY DATA

### Supplementary Figure S1. Flow-chart of the case-cohort design

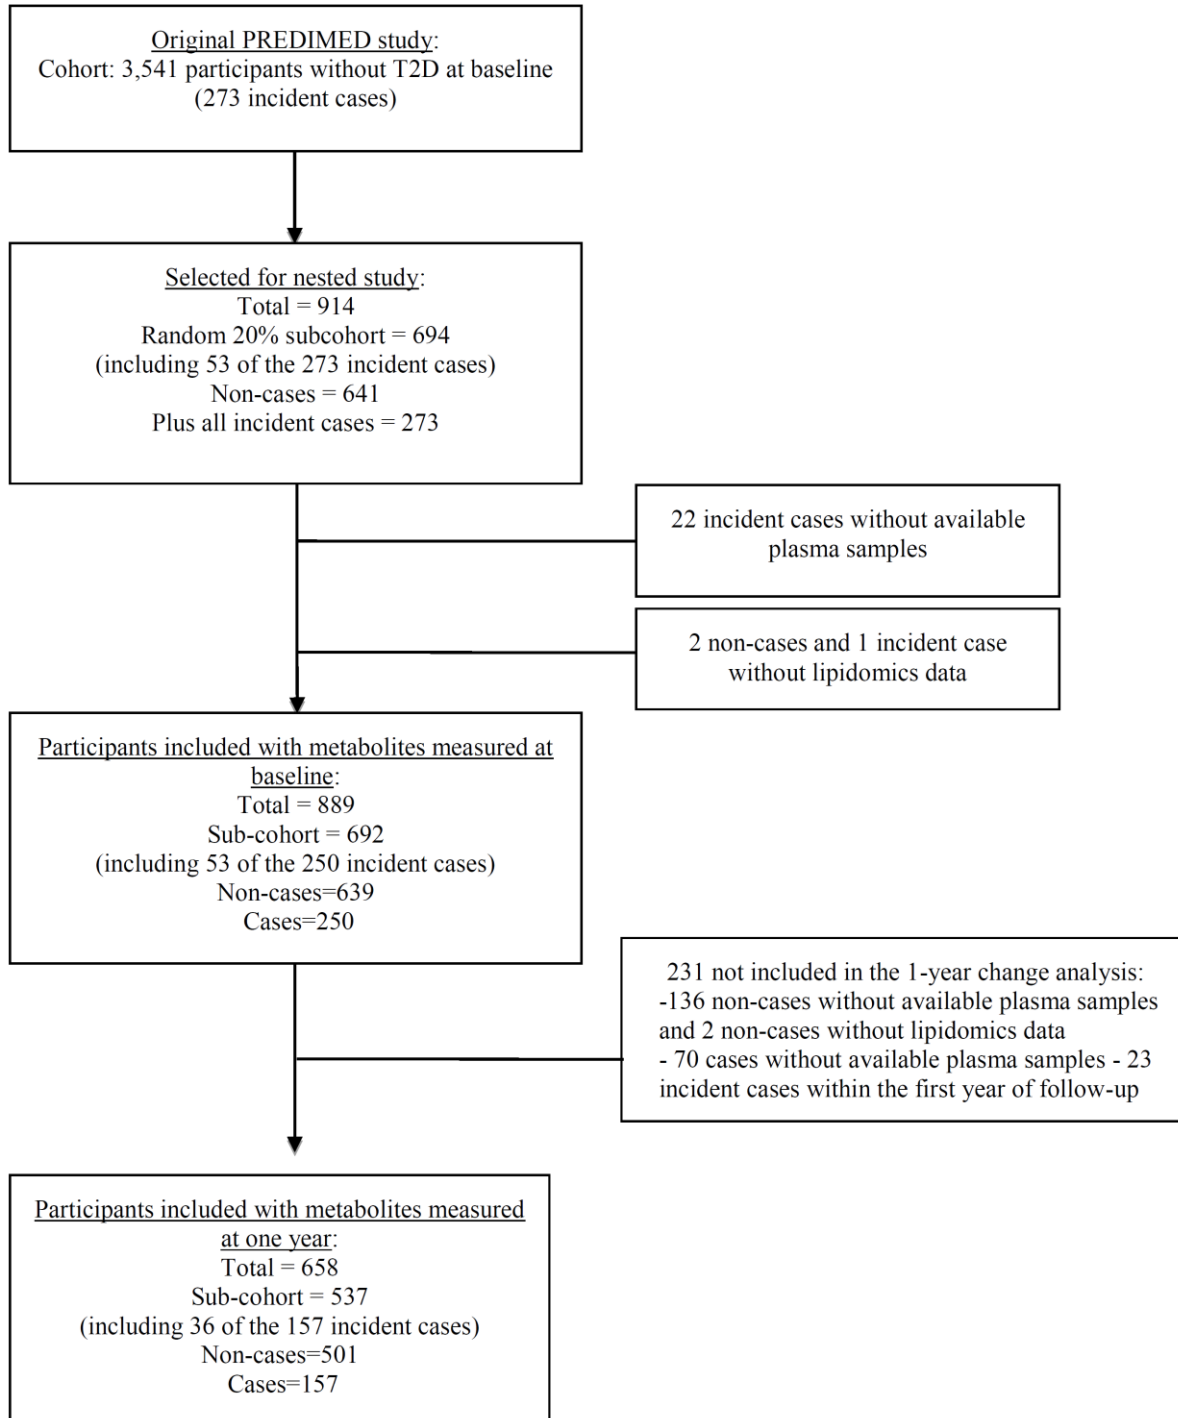

Supplement: DC180840SupplementaryData.pdf [file DC180840SupplementaryData.pdf]
